## 31 **Introduction**

32 COVID-19 cases continue to climb rapidly after causing over 80 million infections and 1.7  
33 million deaths within a year. The causing virus, SARS-CoV-2, is identified to enter human cells  
34 by binding to the angiotensin-converting enzyme 2 (ACE2) protein, following a similar path as  
35 SARS-CoV infection in 2003 [1-3]. However, compared to SARS, mutations in the RBD domain  
36 in SARS-CoV-2 produce a stronger binding affinity to human ACE2 [4-7].  
37 Due to the function of mediating cell entry, the spike protein and its RBD have been the focus of  
38 drug discovery for SARS coronaviruses. To date, hundreds of new research projects are focused  
39 on exploring potential treatments, many are at the preclinical trial phase, and several have  
40 reached the administration stage. For instance, the mRNA-based vaccines developed by  
41 Moderna and Pfizer-BioNTech along with the Oxford-AstraZeneca's vaccine built on the  
42 chimpanzee adenoviral vector supplemented by the SARS-CoV-2 spike protein have been  
43 authorized for emergency use. Besides vaccines, therapeutic antibodies offer additional  
44 advantages including tractable efficacy, stability, and biocompatibility. Several antibody-based  
45 therapeutics to combat SAR-CoV-2 have been developed, including Regeneron's REGN-CoV2  
46 and Eli Lilly's LY-CoV555. The former is a cocktail of two monoclonal antibodies (mAbs),  
47 REGN10933 and REGN10987, that target different RBD regions in order to maintain its  
48 neutralizing activity against future mutations [8], while the latter is isolated from a recovering  
49 COVID-19 patient [9].

50  
51 While developments of new vaccines and therapeutics have progressed rapidly, SARS-CoV-2 is  
52 evolving fast pace, if not faster, and thus poses risks and uncertainties to developed candidates  
53 and products. Several variants including K417N, E484K and N501Y mutations and deletions at  
54 positions 69—70 of the RBD have been reported. One of the spike protein mutations, E484K,  
55 was suggested to hinder the neutralization effects of some polyclonal and monoclonal  
56 antibodies [10, 11]. Some early studies suggest the mRNA-based vaccines developed by  
57 Moderna and Pfizer-BioNTech may be less effective against the recently emerged South Africa  
58 variant [12, 13]. To increase neutralization likelihood and prevent mutational escape,  
59 application of a mixture of monoclonal antibodies, i.e. an antibody cocktail, results in stronger

60 responses that are particularly effective against highly evolving pathogens [8]. Multi-specific  
61 antibody engineering based on a combination of broadly neutralizing antibodies is another  
62 highly effective method to target constantly evolving viruses. This design rationale was used to  
63 generate a trispecific antibody against HIV [14]. The underlying hypothesis is that targeting  
64 different regions of the antigen prevents resistance and escape and further enhances cross  
65 reactivity. Similar strategy using tandem linked single domain camelid antibodies showed  
66 significant efficacy against both influenza A and B viruses [15].

67 Several neutralizing mAbs targeting the spike RBD on the SARS-CoV virus were previously  
68 isolated and structurally characterized. Among them, the antibody 80R binds to an epitope on  
69 the RBD that largely overlaps with the ACE2 interface (Figure 1A), and a strong salt bridge is  
70 characterized as the principal component of 80R efficacy against SARS-CoV [16]. Another  
71 antibody, m396, was reported with the unique ability of blocking both virus fusion and cell  
72 entry via the spike glycoprotein [17], with its epitope overlapping with the ACE2 binding site  
73 but substantially different from the 80R's epitope (Figure 1A). Four CDR loops, H1 – H3 and L3,  
74 mediate extensive interactions with the RBD and promote strong affinity of m396 to the virus  
75 [18]. While 80R and m396 directly block the ACE2 binding site, CR3022 possess an epitope not  
76 overlapping with the ACE2 binding site (Figure 1A), making its combination with other  
77 antibodies an attractive neutralizing agent against SARS-CoV. Moreover, CR3022 was found  
78 effective against the CR3014 escape viruses and in combination with CR3014 provides  
79 prophylaxis against SARS-CoV. For instance, mutations in the SARS-CoV RBD, such as N479S  
80 and P462L, did not eliminate CR3022 neutralization potency [19]. Previous investigations  
81 reported that only CR3022 has detectable binding to the SARS-CoV-2 RBD region [20]. P384A  
82 mutation in the SAR-CoV-2 RBD was able to return the binding affinity to SARS-CoV levels  
83 which suggests that this location plays a vital role in CR3022 neutralization activity. These  
84 observations highlight the importance of optimizing the properties of these mAbs to be used for  
85 therapeutic or prophylactic purposes against SARS-CoV-2 virus.

86 Discovery of antibody therapeutics has rapidly evolved in the past few years, and research in  
87 lead generation and optimization faces strong challenges in needing high success rates and  
88 short timelines. Structure-based rational engineering of antibodies has been shown fast and

89 highly effective in optimizing features of lead candidates, including cross reactivity, potency,  
90 developability, and safety profile. Hereto we selected the above mentioned three structurally  
91 known anti-SARS-CoV monoclonal antibodies with established neutralization potency and fed  
92 them into our computational design pipeline to propose SARS-CoV-2 neutralizing antibodies.  
93 Moreover, combinations of those binders are designed into a multi-specific format aiming to  
94 further enhance the anti-viral potency and tolerance to viral evolution in the RBD.

95

## 96 **Method**

97 **Selection of templates.** SARS-CoV and SARS-CoV-2 share the same RBD-ACE2 interface as a  
98 cell entry path. The RBDs have 76% sequence identity between SARS-CoV and SARS-CoV-2,  
99 and the level of identity decreases to 64% within the RBD-ACE2 interface residues [4] (Figure  
100 1B). Crystal or cryoEM structures of multiple anti-SARS-CoV Fab complexes with the RBD  
101 from SARS-CoV or SARS-CoV-2 are available; we select three clones, m396, 80R, and CR3022 as  
102 our templates, with the filtering criteria of continuously overlapping epitopes, ranging from  
103 highly conserved RBD surface to more mutation prone (Figure 1A&B).

104 **Developability assessment and engineering at Fv level.** The Fv of the candidates were isolated  
105 from their complex structure and subjected to computational prediction of developability  
106 features including surface patches, chemical degradation of Asp and Asn, and oxidation of Met.  
107 Patch calculation included spatial aggregation propensity (SAP) [21] using Discovery Studio  
108 (BIOVIA, Dassault Systèmes) with a 5 Å radius and clustering of residues in the patch analysis  
109 using Molecular Operation Environment (MOE) version 2019.0102 [22]. Patches larger than 50  
110 Å<sup>2</sup> were selected for further visual inspection. Deamidation and isomerization motifs were  
111 analyzed with bioMOE using structure-based prediction models developed by Sydow et al. [23]  
112 and Robinson et al. [24]. Risk of methionine oxidation was predicted using sulfur solvent-  
113 accessible area and 2-shell models with bioMOE [25]. Residue scanning on the patch residues  
114 or chemical liability motifs were manually inspected and mutation strategies were made  
115 following two criteria: 1) mutation does not impact binding; and 2) mutation reduces patch  
116 area.

117

118 **Structures preparation for SARS-CoV-2 reactivity engineering.** All antibody sequences  
119 reported here are renumbered using continuous peptide numbering. The RBD from SARS-CoV-  
120 2 spike structure is used to replace the RBD in the m396 and 80R complexes. For 80R, the single  
121 chain Fv (scFv) was split to Fv with standard VH-VL pairing and the linker between VH and VL  
122 in the scFv was removed. Antibody residues that are within 6 Å of the RBD are selected and  
123 fed to residue scanning in MOE, Rosetta, TopNetTree, and SAAMBE3D. To prepare the  
124 structures for residue scanning, the PDB model of Fab/Fv with RBD2 were initially protonated  
125 and energy minimized with MOE. For calculations in Rosetta and machine learning based  
126 methods, the MOE minimized structure was further relaxed with Rosetta.  
127 **MOE.** The MOE computation workflow, unless specified, was performed with MOE.2019.01.02  
128 [22] with Amber10 forcefield [26] and Born solvation model [27]. After protonation and  
129 minimization, all selected residues that are within 6 Å of the antigen were subjected to single  
130 residue scanning to 20 natural residues with ensemble LowMode [28]. For ensemble generation,  
131 residues located outside 4.5 Å away from the mutation site were fixed.  
132 **Rosetta Flex ddG.** Flex ddG is built upon the Rosetta architecture and incorporates the  
133 conformational sampling of backbone and side chain torsions into the free energy calculation  
134 using the Talaris scoring function in Rosetta[29]. Following the nonlinear reweighting protocols,  
135 i.e. generalized additive models, of the Rosetta energy function computed for each structure of  
136 mutant and wildtype at complex and unbound states, Flex ddG estimates the  $\Delta\Delta G$  values.  
137 Firstly, the three RBD-Fv complex structures prepared by MOE were energy minimized using  
138 the Rosetta FastRelax protocol. For each complex, the lowest energy structure was chosen from  
139 the 10 relaxed structures and used for the next step. Secondly,  $\Delta\Delta G$  estimates for each single  
140 point mutation were calculated using the "Flex ddG" protocol with default parameters as  
141 described in the reference [30], except for using 10 instead of 35 averaged models due to  
142 computational constraints. This change was made according to the observation in the original  
143 publication that the correlation and mean absolute error between predicted  $\Delta\Delta G$  and  
144 experimental  $\Delta\Delta G$  became stable when the number of averaged models was around 10 or more  
145 [30].

146 **TopNetTree.** TopNetTree is a machine learning (ML) model that utilizes site-specific persistent  
147 homology to extract the local geometric information of the protein complexes and mutation  
148 sites [31]. As such, this method simplifies the complexity of the 3D atomic structure and in  
149 conjunction with ML methods, including convolutional neural networks and gradient-boosting  
150 trees, it is able to capture the change in the underlying biochemical features, such as hydrogen  
151 bonding and dispersion interaction represented at the zeroth homology group  $H_0$ , along with  
152 the structural change, represented at first and second homology groups  $H_1$  and  $H_2$ , at the  
153 mutation site. The model is trained and validated on different single site mutation datasets,  
154 including computational and experimental data, such as SKEMPI v2.0 [32] and AB-Bind [33].  
155 Validation results of this method illustrate satisfactory performance across different databases  
156 and mutation regions (accessible surface area) for the  $\Delta\Delta G$  prediction. The  $\Delta\Delta G$  calculations  
157 were performed using both topological and physiochemical properties. The original  
158 TopNetTree model parameters were used in this study. The optimized complex structures  
159 obtained from Rosetta were used as input for free energy calculations. To maintain consistency  
160 with TopNetTree methodology each structure was further optimized with the profix module in  
161 Jackal modeling suite.

162 **SAAMBE-3D.** SAAMBE-3D is an ML based model that is constructed based on a variety of  
163 features spanning across multiple chemical, physical, sequential and mutation specific  
164 properties. This allows SAAMBE-3D to efficiently extract essential information from the  
165 structure and predict the  $\Delta\Delta G$  upon mutation. We downloaded and used, without  
166 modification, the scripts and models associated with the publication [34]  
167 ([http://compbio.clemson.edu/saambe\\_webserver/index3D.php](http://compbio.clemson.edu/saambe_webserver/index3D.php)). The model was trained on 3753  
168 single point mutations from 299 different protein-protein complexes, of which approximately  
169 650 mutations were from 76 Ag-Ab complexes. We did not re-train the model on the more  
170 relevant Ag-Ab subset as the significant reduction in the dataset size may decrease the  
171 performance of the model. Rosetta optimized structures for each Fv-RBD system were used as  
172 the initial structure for SAAMBE-3D calculations.

173 **Consensus Z-score.** Z-scores were used to extract the favorable mutations for each system.  
174 Coupled with the structural inspection, z-scores have been shown to accurately highlight/guide

175 mutation selection from the vast affinity maturation calculations. We used a modified Z-score as  
176 suggested by Sulea et al. [35] where the median and median absolute deviation (MAD) were  
177 used based on the following equation:

$$178 \quad Z_i = (x_i - x_{\text{med}}) / (1.4826 * \text{MAD})$$

179 Each Z-score was averaged over the four methods. Top 60 average scores for each system  
180 supplemented with the structural inspection to select the final list of affinity promoting  
181 mutations.

## 182 **Results**

183 **Selection of three neutralizing antibodies.** Monoclonal antibodies 80R, m396, and CR3022  
184 have been well characterized to prove their neutralizing potency to SARS-CoV virus. The  
185 mutations between SARS-CoV-2 and SARS-CoV RBD make these neutralizers not immediately  
186 applicable to block the RBD-ACE2 interactions [36, 37]. Publicly available high-quality  
187 structures of Fab in complex with RBD allow us to quickly design SARS-CoV-2 binders through  
188 our structure-based rational engineering platform, which has been serving our cross reactivity  
189 and affinity maturation engineering purposes in biologics projects [38]. The epitopes of these  
190 three antibodies are located in relatively conserved surfaces on the RBD (Figure 1A&B). The  
191 80R and m396 epitopes largely overlap with the ACE2 binding site, which limits the possibility  
192 of escaping mutations on the RBD as mutations abolishing ACE2 interaction are unfavorable.  
193 Although the CR3022 epitope is distal from the ACE2 binding site, it has been shown as a  
194 conserved epitope between SARS-CoV and SARS-CoV-2 [20]. Additionally, the glycosylation  
195 sites (N331 and N343) in the SARS-CoV-2 RBD are away from the epitopes of the three  
196 antibodies, making it less likely to shield antibody binding (Figure 1A) [39]. Lastly, 80R and  
197 CR3022 utilize kappa, while m396 uses lambda light chain. The difference in light chains also  
198 helps assembly design into multi-specific antibodies and minimize mispairing risks.

199 **In silico mutagenesis and consensus Z-score.** For each complex structure, antibody residues  
200 within 6 Å from the RBD were selected for  $\Delta\Delta G$  calculations upon mutation to all 20 amino  
201 acids. This resulted in 48, 35, and 34, mutation sites corresponding to 80R, m396, and CR3022,  
202 respectively. Figures 2D, 3D, and 4D depict the results of  $\Delta\Delta G$  calculations performed on 80R,  
203 m396, and CR3022, respectively, using the 4 computational methods discussed before. Due to

204 the mutational structure sampling algorithms, the binding affinity scores comparing mutations  
205 to wild type (e.g. H:S101S) can be nonzero. For normalization, the  $\Delta\Delta G$  value for each mutation  
206 is offset so that the wild type mutations are zero. Interestingly, predicted  $\Delta\Delta G$  values obtained  
207 from SAAMBE-3D are mainly unfavorable (positive values), and the range of predicted values  
208 is smaller than other methods. Another observation is the large variation of predicted values  
209 among these four methods, reflecting the need of an approach to effectively rank the mutations.  
210 Previous studies in binding affinity predictions suggest that using a consensus approach over  
211 different methods can improve prediction accuracy [35, 40-45]. Following this rationale, we  
212 applied a similar strategy to rank the single mutations from the four computational predictions  
213 for each antibody. We used relative ranking instead of absolute score due to different  
214 magnitudes and scales of the four methods. A Z-score describes a value's relationship to the  
215 mean of a group of values, which is useful for normalization of raw scores. Here we used a Z-  
216 score based on the median value instead of the mean value for each scoring function, which  
217 reduces the sensitivity of Z-scores to outliers. By averaging the Z-score from the four methods,  
218 consensus Z-scores were computed, and the top ranked mutations were visualized to validate  
219 the predictions. For each system we selected the top 60 mutations as presented in Table 1.

220 **Structural inspection.** During the structural inspection, physiochemical factors, such as spatial  
221 limitations, removal of salt bridge or hydrogen bond, deletion or introduction of Cys, Met, and  
222 Pro residues were taken into consideration. As shown in Figure 2C and Table 1, selected  
223 mutations for 80R belong to positions D50, A51, S52, S67, S92 in the light chain; and N57, R100,  
224 S101 in the heavy chain. Since A51 is in the vicinity of Y489, F490, and Q493, it is expected that  
225 mutations to Phe, Trp, or Tyr will promote formation of  $\pi-\pi$  interactions, while mutations to  
226 Glu, His, Arg, and Lys may facilitate hydrogen bond interactions with Q429. Similarly,  
227 mutations at site 50 and 32 can either strengthen the hydrogen bond or form nonpolar  
228 interactions with the bonding partners on the RBD. Side chains of residue 100 and 101 on the  
229 heavy chain are in close proximity to Y505, therefore, introduction of aromatic side chains in  
230 these locations are presumably favorable. Heavy chain S101D mutation was selected due to  
231 possible hydrogen bond enhancement for interacting with N501 (Figure 4C).

232



233 As shown in Figure 3C and Table 1, top ranked affinity enhancing mutations for m396 are  
234 primarily located at the CDRH2 loop, such as residues 52–59. These residues are in a close  
235 contact with R403, Q498, Y505, and N501 on the RBD. H:I57R and H:N59R mutations can  
236 introduce a salt bridge with D405 resulting in stronger binding to the RBD. H:S31X mutations,  
237 where X is polar side chain, increases the possibility of hydrogen bond formation with T500 and  
238 N501 on the RBD. Structural investigation does not support the H:S31F change as it disrupts the  
239 hydrogen bond network at this site. However, due to the large Z-score and consistency of the  
240 three methods, including MOE, Flex ddg, and TopNetTree, this mutation was included in the  
241 suggested list. Mutations on the light chain, including L:G29X and L:S30X, where X is an  
242 aromatic mutation, is highly favorable as these side chains are in proximity of Y369 and F374.  
243 L:S30E, L:S30H, and L:S30K can result in strong hydrogen bond interactions with the backbone  
244 of the RBD near L:S30. Lastly, L:S93E may introduce a salt bridge with the R408 side chain.  
245 As shown in Figure 4C and Table 1, selected mutations on the light chain of CR3022 are located  
246 on 4 sites, 33–35 and 62. The polar substitutions of these residues are justified through  
247 possibility of formation of a hydrogen bond network with D428 and T430 on the RBD, whereas  
248 nonpolar mutations can enhance the hydrophobic interactions with L517. The selected  
249 mutations on H:G101 and H:S103 of the heavy chain are all of aromatic nature due to their  
250 proximity to Y380 and F377. Chain elongation and a more polar headgroup in the H:S100Q  
251 substitution can potentially enhance the hydrogen bond network with S383, T385, and K386.  
252 H:I102Y is likely to enhance interactions with Y380, while H:T104E and H:Y27R mutations could  
253 promote a stronger hydrogen bond network with S383 and N370, respectively.

254

### 255 **Developability engineering.**

256 Computational developability risk assessments were focused on chemical liability sites that are  
257 nearby or within the paratope and surface patch forming residues, such as hydrophobic and  
258 charged residues.

259 De-risk plan for antibodies 80R and CR3022 is proposed only for chemical liabilities. In 80R,  
260 CDRH2 largely contributes to RBD binding. H:D54-G55 which sit in the middle of CDRH2 are  
261 considered high risk, although H:D54 does not directly contact RBD residues; H:D54E mutation

262 is therefore proposed. In CR3022, D54 in the DS motif in CDRH2 forms salt bridge to K378 in  
263 the RBD. H:D54E mutation is proposed, as H:D54 flanking residues are not directly interacting  
264 with the RBD and H:D54 sits in a relatively flexible loop. Surface patches on those two  
265 antibodies are generally smaller than 100 Å<sup>2</sup> and are considered as low risk. One cluster of  
266 hydrophobic residues exists in CR3022 around CDRL2 and the 17-residue long CDRL1. The  
267 hydrophobic interface (L: I34, Y55, W56) is critical for RBD binding, and the surface is  
268 surrounded by charged residues. Therefore, no mitigation plan is proposed on the CR3022  
269 hydrophobic patch.

270         Among the three selected antibodies, m396 has the highest developability risk, with a  
271 130 Å<sup>2</sup> hydrophobic patch around CDRH2 (H:I54-L55-G56-I57), and a 130 Å<sup>2</sup> acidic patch  
272 around CDRL2 (L:D50-D51-S52-D53) (Figure S1B). Chemical liabilities in m396, including  
273 exposed H:M102 in CDRH3, L:N26-N27 motif in CDRL1 and L:D92-S93 motif in CDRL3, were  
274 predicted as moderate risk since those residues are not directly mediating RBD recognition. To  
275 mitigate the risks in m396, mutations giving higher consensus scores at residues L:N26, L:D51,  
276 L:D92, H:I54, H:L55, H:I57, and H:M102 were selected into the screening library (Figure 3D,  
277 Tables 1, 3).

278  
279 **Library design.** With proposed affinity and developability optimization mutations, we next  
280 proceeded to design three focused libraries for 80R, m396, and CR3022 individually. The  
281 designed libraries will be used by a high-throughput system, such as phage display, to screen  
282 for high affinity binders. Table 2-4 summarizes variations at different positions in the three  
283 libraries. The resulting theoretical library sizes are all smaller than  $1 \times 10^{11}$ , which are suitable  
284 for phage display screening.

285  
286 **Trispecific antibody design and Fc selection.** SARS-CoV-2 has shown fast mutation rates  
287 among discovered variants, therefore combining neutralizing antibodies with different epitopes  
288 into a multi-specific format can benefit both potency and breadth, especially for future variants.  
289 We therefore proposed to engineer the three mAbs, after affinity optimization against SARS-  
290 CoV-2, into a trispecific format, which has been demonstrated successful in HIV neutralization

291 [14]. The trispecific format includes a single Fab arm derived from a normal immunoglobulin G  
292 (IgG) with a double Fv arm generated in the CODV-Ig format (cross-over dual variable Ig-like  
293 proteins) [46] (Figure 5A-B). We modeled all possible combinatorial structures of CODV in  
294 complex with SARS-CoV-2 spike proteins (Figure 5C-D). Interestingly, it had been reported that  
295 CR3022 binding requires rearrangements in the S1 domain of the spike protein which results in  
296 dissociation of the spike [47]. A similar observation that CR3022 showed incompatibility to all  
297 possible CODV configurations led us to keep CR3022 in the Fab arm and use m396 and 80R in  
298 the CODV arm. After examining the structural compatibility, option 2 (80R as VH1/VL2, m396  
299 as VH2/VL1) showed to be the best geometrical configuration (Figure 5C-D).

300 Modifications to the Fc domain are devised to block the contact formation between the Fc  
301 region and effector cells. Antibody-dependent enhancement (ADE) potentially poses a safety  
302 risk to an antibody treatment, and anti-SARS-CoV-2 antibodies could exacerbate COVID-19  
303 through antibody-dependent enhancement [48]. Although effector function has been recently  
304 reported as essential for optimal efficacy in SARS-CoV-2 monoclonal antibody SC31 [49],  
305 considering the triplicated valency in our CODV-IgG trispecific antibody, we included NNAS  
306 glycosylation at the Fc $\gamma$ R interface [50] to completely eliminate Fc-mediated effector functions  
307 therefore minimizing ADE risk, and DQ mutations at the FcRn interface [51] to extend antibody  
308 half-life.

309

## 310 **Discussion**

311 The devastating COVID-19 pandemic urges faster and smarter designs of treatment to patients  
312 worldwide. Antibody therapies have been shown to have the advantages of large-scale  
313 production and anti-viral potency. Structure-based rational engineering to redesign well  
314 characterized SARS-CoV neutralizing mAbs enables quick solutions to create a pool of SARS-  
315 CoV-2 neutralizers with known epitopes. In this work we share our knowledge in antibody  
316 engineering especially in multi-specific formats. Using computational protein engineering tools,  
317 we proposed a multi-specific antibody based on optimization of SARS-CoV neutralizing  
318 antibodies. Our extensive exploration of mutational space involved in the direct interaction  
319 with the SARS-CoV-2 RBD has produced a mutation library that is expected to improve the

320 efficacy of these antibodies against the SARS-CoV-2 virus. Physiochemical properties and free  
321 energy calculations of each mutation were taken into consideration in building our mutation  
322 library. The satisfactory level of agreement and consistency among three of the methods used in  
323 this study, including MOE, Rosetta Flex ddc, and TopNetTree, highlights the effectiveness of  
324 our proposed library design.

325 Several AI-guided studies have been carried out to discover treatment against SARS-CoV-2  
326 virus, including the work from Magar et al. [52] and Desautels et al. [53]. Using a ML-based  
327 algorithm, Magar and coworkers proposed single and combinatorial mutations on 80R and S230  
328 antibodies with potentially better antibody response. In the case of 80R, the proposed mutations  
329 are largely distal from the binding site, and they don't overlap with our proposal. Since the ML-  
330 based model was trained on patient neutralization response, it may capture different properties  
331 related to neutralization rather than direct interaction with antigen. It is intriguing that there  
332 may be a synergistic effect when combining the ML-based mutations with our proposed  
333 mutations in neutralization activity. In another work from Desautels et al., antibody candidates  
334 were proposed using an active learning protocol where the model takes Rosetta scores as  
335 ground truth and continuously improves its predictability. Complex structures of SARS-CoV  
336 neutralizing Abs, including S230, m396, and F26G19, were fed to the algorithm, and mutants  
337 with favorable predicted Rosetta scores were proposed. The mutants were further selected by  
338 free energy calculations using MD simulations under the implicit solvent model (GBSA). After  
339 all, mutations were selected based on Rosetta score and MM/GBSA free energy, while the ML  
340 model was used to predict Rosetta scores of large numbers of mutations. In contrast, our  
341 method used two separate ML-based models predicting affinity changes directly and assembled  
342 the results together with two physics-based methods, one Rosetta-based and one similar to  
343 MM/GBSA. By this more diverse scoring system, we expect to increase the prediction accuracy.  
344 Moreover, a high-throughput screening method enables testing more mutations and their  
345 combinations, which will further increase the possibility of success.

346 Continuous evolution of SARS-CoV-2 virus remains a significant threat even after the successes  
347 of current vaccine development. Among the mutations in the UK and South African strains,  
348 E484K is within the 80R epitope, while N501Y is within both 80R and m396 epitopes (Figure

349 1B). This emphasizes the importance of combining multiple antibodies with different epitopes,  
350 especially to include antibodies with conserved epitopes, such as CR3022. Given the success  
351 shown in the HIV study, our trispecific format is one of the suitable formats for 3-in-1 antibody  
352 design. However, it requires careful geometry modeling and sequence optimization for further  
353 developability.

## 354 355 **Conclusions**

356 In this study, we used computational protein engineering tools to optimize SARS-CoV  
357 neutralizing mAbs against SARS-CoV-2 virus. Three mAbs were used as templates where their  
358 complex structures with SARS-CoV-2 RBD were optimized following modeling protocols in  
359 Rosetta and MOE simulation packages. Subsequently, extensive free energy calculations were  
360 carried out on the residues in contact with the RBD. Two physics-based and two ML-based free  
361 energy calculation suites were utilized to perform the affinity maturation calculations. For each  
362 system, developability assessment was done and a focused library was proposed for high-  
363 throughput screening of high affinity and developable Fabs against the SARS-CoV-2 RBD.  
364 Lastly, a design of combining the three antibodies in a trispecific format was achieved, aiming  
365 for high potency and broad neutralization activity.

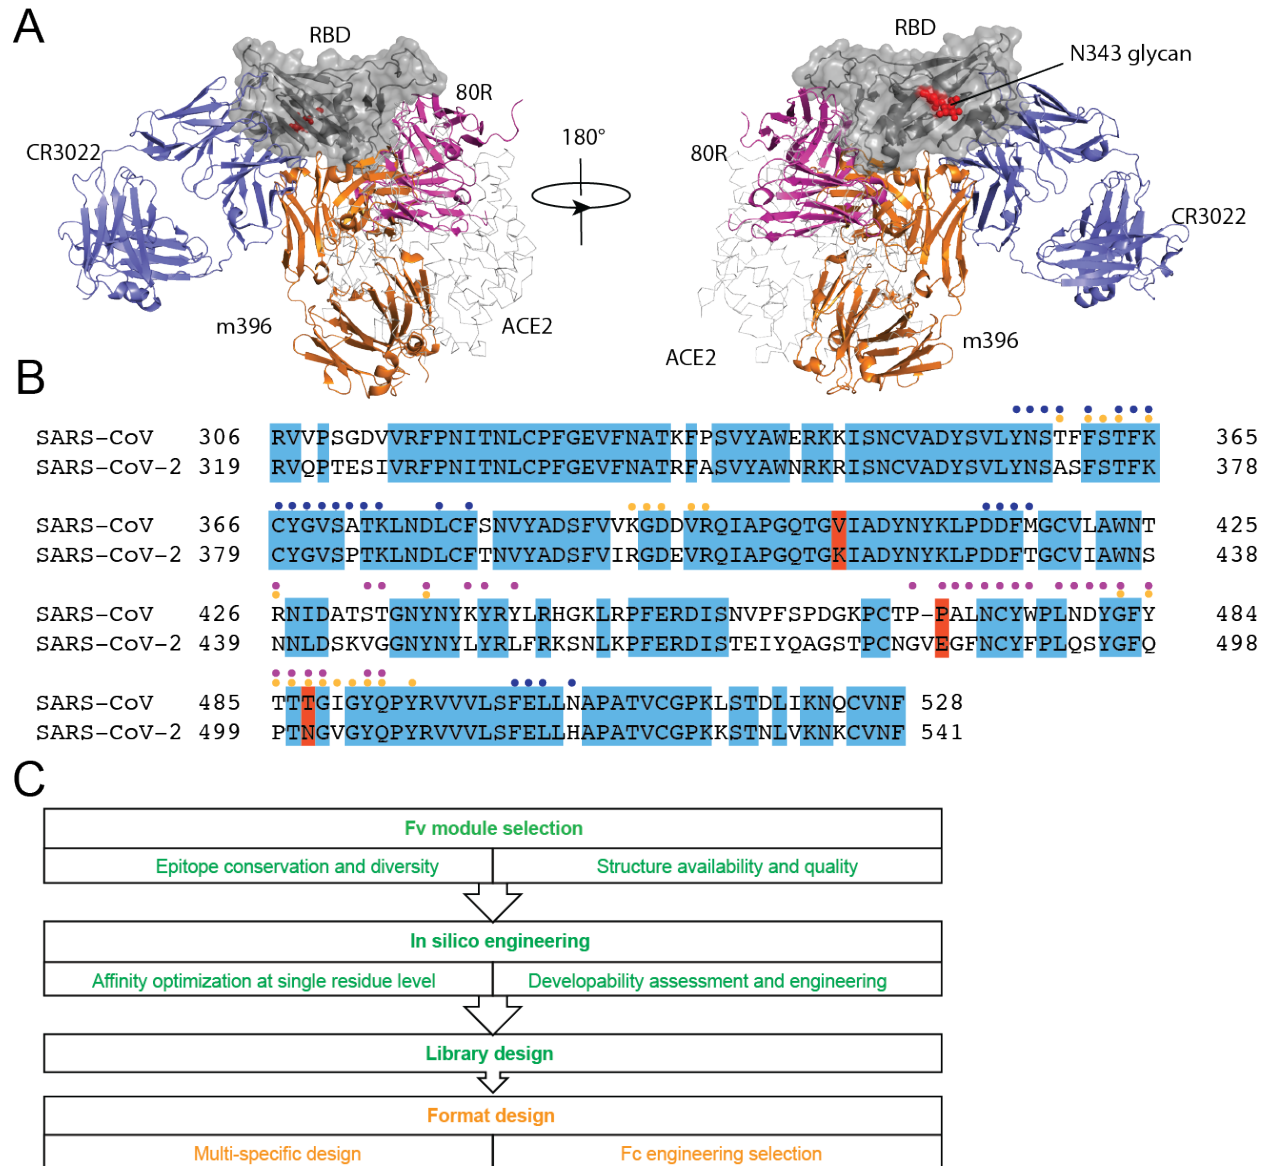

366

367 **Figure 1. Redesign of the three anti- SARS-CoV RBD antibodies to target SARS-CoV-2. (A)**  
 368 Structural superimposition of CR3022 (cartoon representation colored in blue, PDB code 6W41),  
 369 m396 (cartoon representation colored in orange, PDB code 2DD8), 80R (cartoon representation  
 370 colored in magenta, PDB code 2GHW), and ACE2 (ribbon representation colored in grey, PDB  
 371 code 6M17) on their binding to SARS-CoV or SARS-CoV-2 RBD. N-glycosylation at N343 site is  
 372 shown as red sphere, while glycosylation at N313 site is not visible in the crystal structures. **(B)**  
 373 Sequence alignment of the SARS-CoV-2 and SARS-CoV RBDs. Conserved residues between  
 374 SARS-CoV and SARS-CoV-2 are highlighted in blue color. Recent UK and South African SARS-  
 375 CoV-2 mutation sites are highlighted in red. Epitope residues are indicated by colored dots:  
 376 blue for CR3022, orange for m396, and magenta for 80R. **(C)** Schematic workflow for  
 377 engineering of the three antibodies. Green text indicates engineering toward developability and  
 378 cross reactivity, and orange text indicates format related designs in Fab and Fc regions.

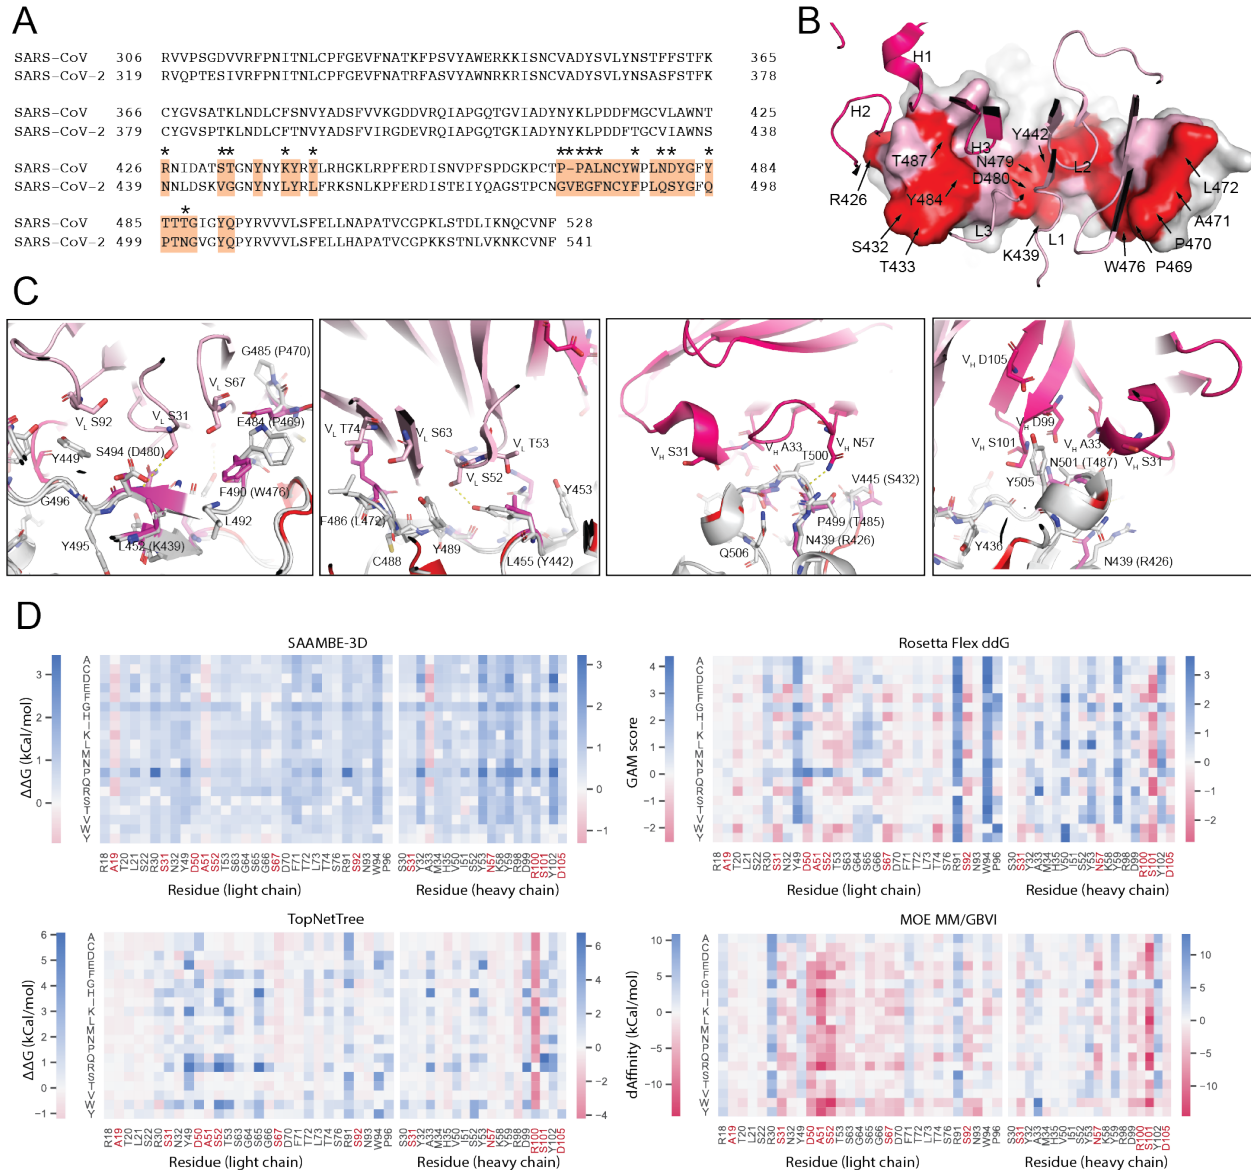

379  
 380 **Figure 2. Engineering of 80R.** (A) Sequence alignment of SARS-CoV-2 and SARS-CoV RBDs.  
 381 80R epitope residues are highlighted in orange. Non-conserved epitope residues are marked  
 382 with asterisks. (B) Epitope residues on SARS-CoV-2 are shown. CDR loops are labeled. Epitope  
 383 residues that are conserved between SARS-CoV-2 and SARS-CoV are shown in pink, and those  
 384 that are not conserved are shown in red. (C) Interactions between selected 80R residues for  
 385 engineering and epitope residues are shown. Amino acid variants observed in SARS-CoV are in  
 386 parentheses. SARS-CoV-2 RBD is grey, 80R heavy chain is magenta, and 80R light chain is pink.  
 387 Residues are numbered according to their positions on the SARS-CoV-2 S protein sequence. (D)  
 388 Heatmap of prediction of all possible mutations for selected residues on 80R from SAAMBE-3D,  
 389 TopNetTree, Rosetta flex ddG, and MOE MM/GBVI methods. Residues selected for library  
 390 design are colored in red.

391  
 392

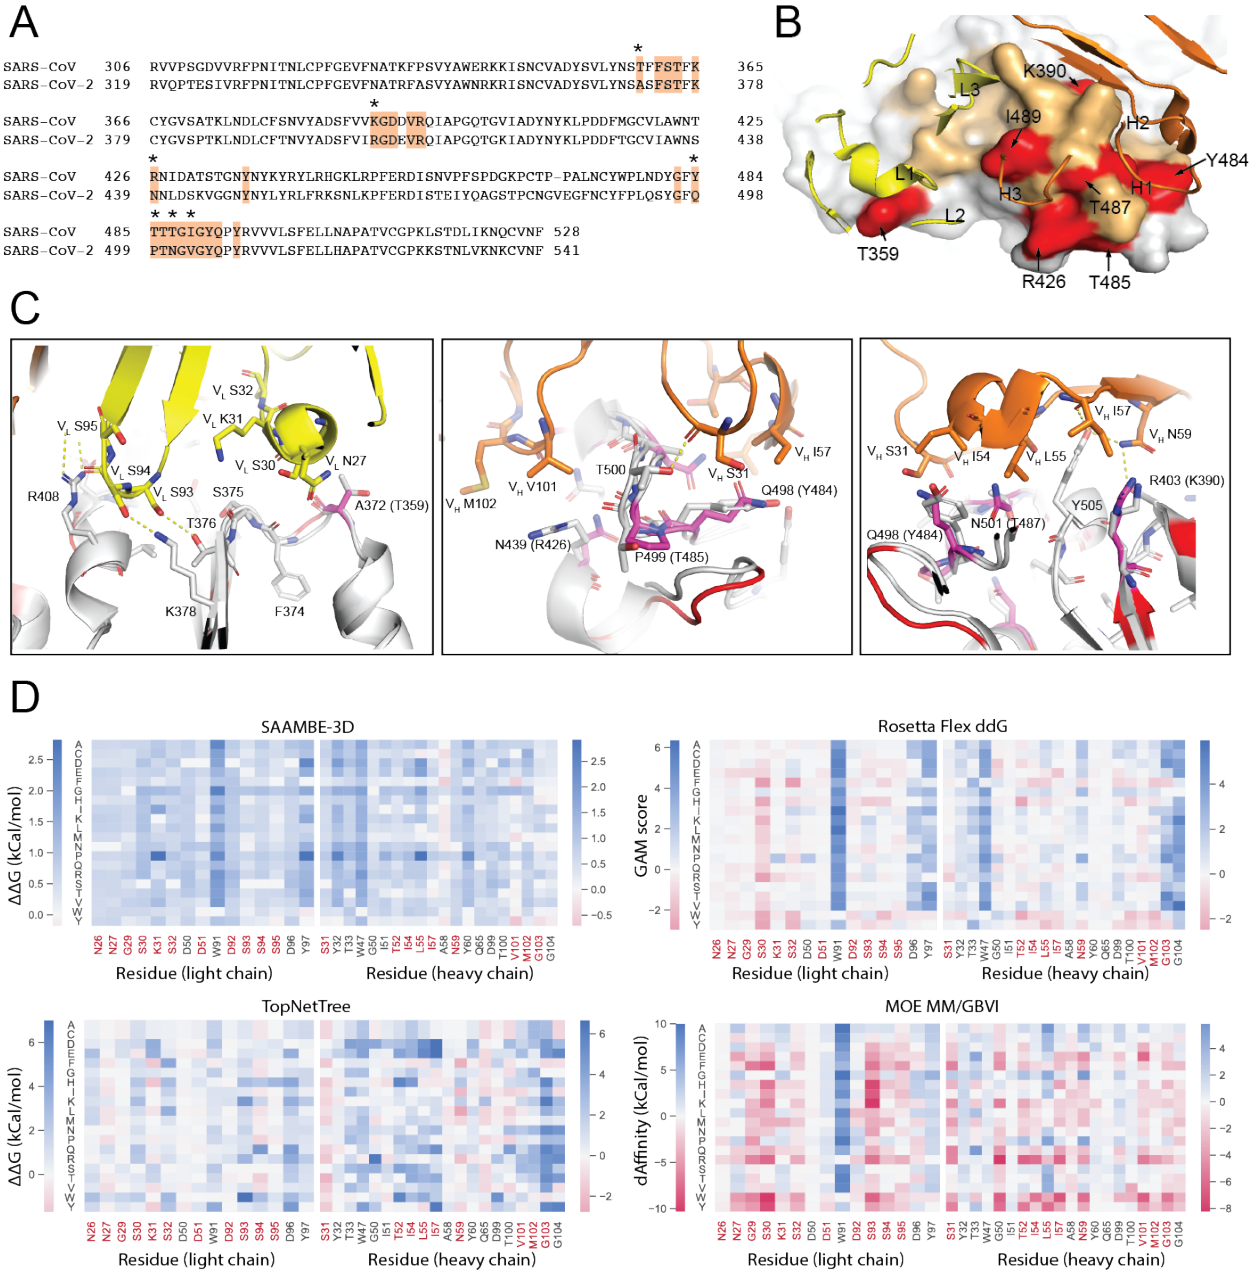

393

394 **Figure 3. Engineering of m396.** (A) Sequence alignment of SARS-CoV-2 and SARS-CoV RBDs.

395 M396 epitope residues are highlighted in brown. Non-conserved epitope residues are marked

396 with asterisks. (B) Epitope residues on SARS-CoV-2 are shown. CDR loops are labeled. Epitope

397 residues that are conserved between SARS-CoV-2 and SARS-CoV are shown in orange, and

398 those that are not conserved are shown in red. (C) Interactions between selected m396 residues

399 for engineering and epitope residues are shown. Amino acid variants observed in SARS-CoV

400 are in parentheses. SARS-CoV-2 RBD is grey, m396 heavy chain is orange, and m396 light chain

401 is yellow. Residues are numbered according to their positions on the SARS-CoV-2 S protein

402 sequence. (D) Heatmap of prediction of all possible mutations for selected residues on m396

403 from SAAMBE-3D, TopNetTree, Rosetta flex ddG, and MOE MM/GBVI methods. Residues

404 selected for library design are colored in red.



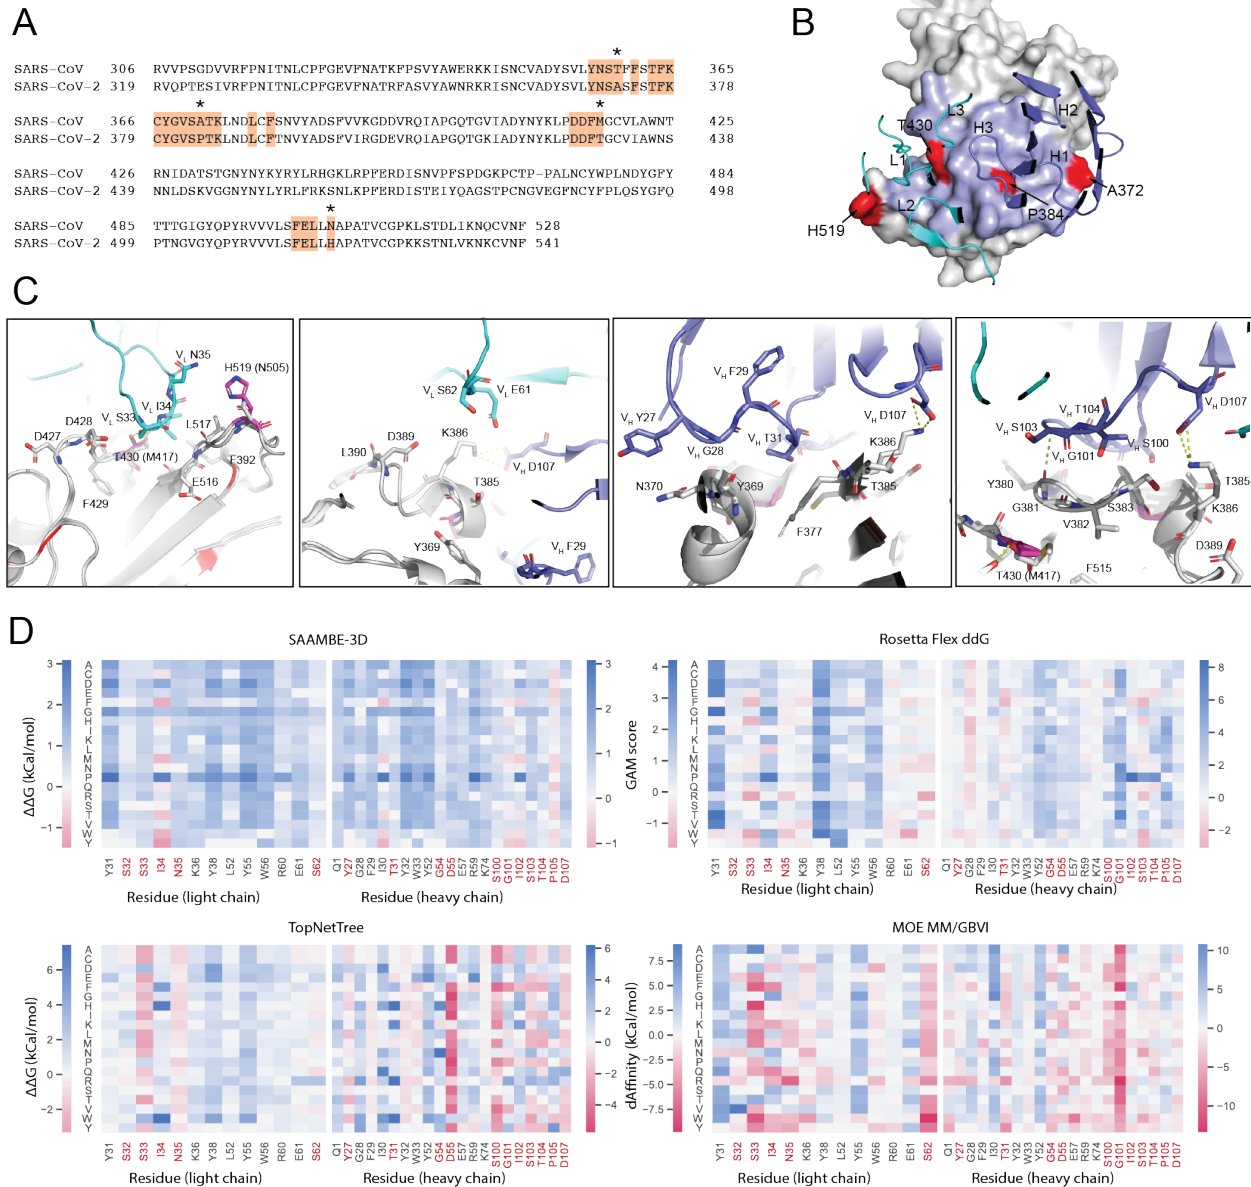

405

406 **Figure 4. Engineering of CR3022.** (A) Sequence alignment of SARS-CoV-2 and SARS-CoV  
 407 RBDs. CR3022 epitope residues are highlighted in brown. Non-conserved epitope residues are  
 408 marked with asterisks. (B) Epitope residues on SARS-CoV-2 are shown. CDR loops are labeled.  
 409 Epitope residues that are conserved between SARS-CoV-2 and SARS-CoV are shown in blue,  
 410 and those that are not conserved are shown in red. (C) Interactions between selected CR3022  
 411 residues for engineering and epitope residues are shown. Amino acid variants observed in  
 412 SARS-CoV are in parentheses. SARS-CoV-2 RBD is grey, CR3022 heavy chain is blue, and  
 413 CR3022 light chain is cyan. Residues are numbered according to their positions on the SARS-  
 414 CoV-2 S protein sequence. (D) Heatmap of prediction of all possible mutations for selected  
 415 residues on CR3022 from SAAMBE-3D, TopNetTree, Rosetta flex ddG, and MOE MM/GBVI  
 416 methods. Residues selected for library design are colored in red.

417

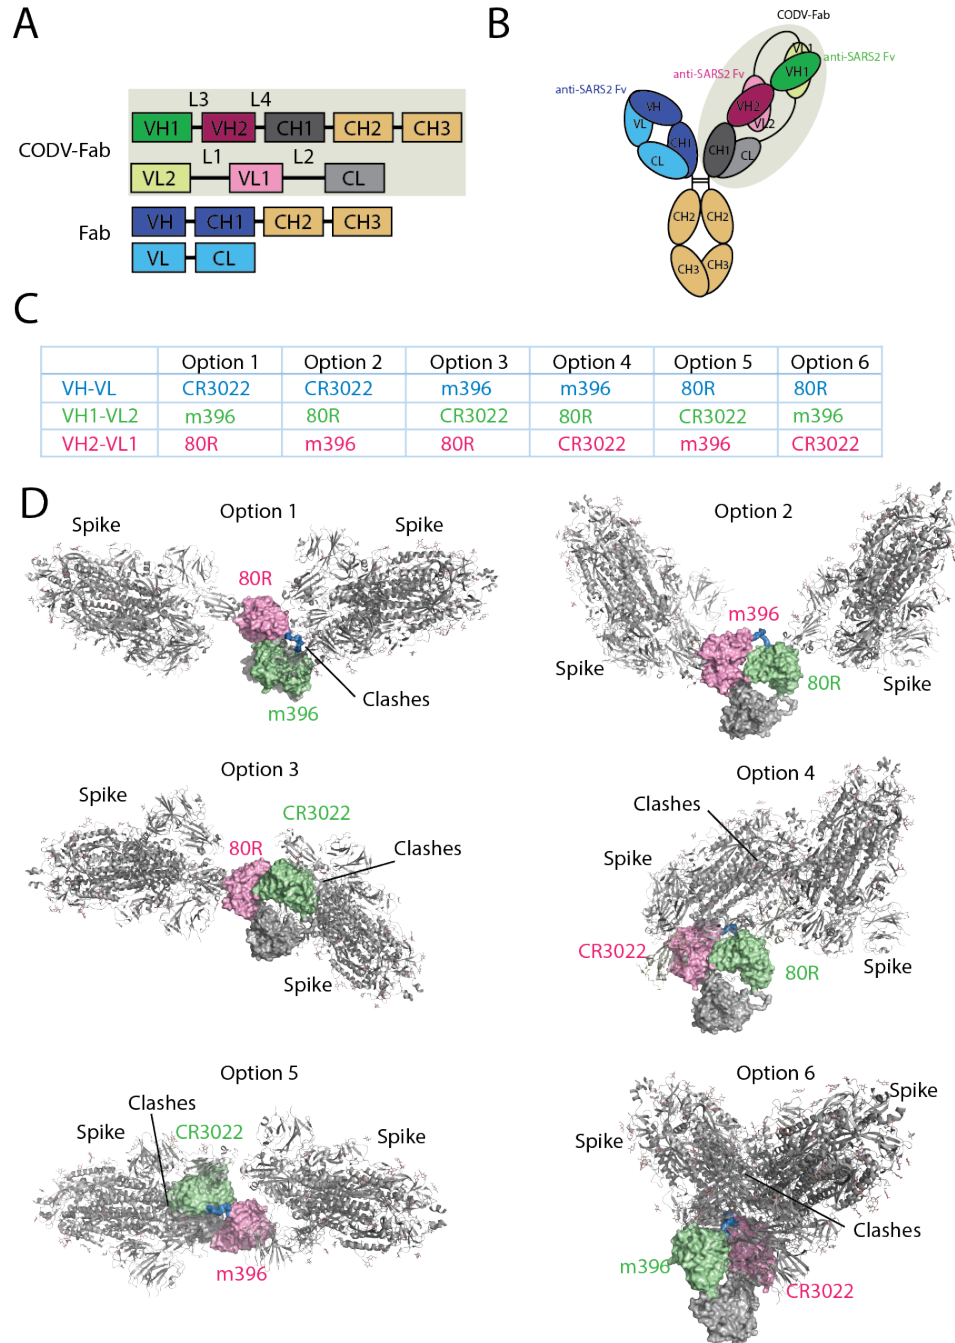

418  
419  
420  
421  
422  
423  
424  
425

**Figure 5. Trispecific antibody engineering.** (A) Schematic linear configuration of the trispecific antibody color-coded by position. Dark shades (blue, purple, or green) denote heavy chain peptides; light shades denote light chain peptides. (B) Schematic cartoon configuration of the trispecific antibody shown in cartoon. Same color scheme is used as that in (A). (C) All possible combinations of the three Fvs in the trispecific format. (D) Structural modeling showed only Option 2 as the optimal geometrical configuration. The CODV is shown in surface format and color coded as in (A-C), and the spike proteins are shown in grey colored cartoon.

426 **Table 1. Top 60 mutations ranked by consensus Z-scores.** Mutations are represented in “Chain  
 427 ID: Mutation” format and are associated with consensus z-scores calculated by the formula in  
 428 the Methods section.

| 80R            |         | m396           |         | CR3022         |         |
|----------------|---------|----------------|---------|----------------|---------|
| chain:mutation | Z score | chain:mutation | Z score | chain:mutation | Z score |
| H:S101W        | -3.068  | L:S30Y         | -2.865  | H:S103W        | -2.238  |
| H:R100W        | -3.029  | L:S30F         | -2.464  | H:G101F        | -2.169  |
| H:S101M        | -2.905  | L:S30W         | -2.351  | L:S33H         | -1.939  |
| H:S101L        | -2.886  | H:L55Y         | -2.241  | L:S33F         | -1.828  |
| L:A51F         | -2.604  | H:V101Y        | -1.863  | H:G101A        | -1.653  |
| L:A51H         | -2.558  | L:S93H         | -1.797  | L:S33M         | -1.630  |
| H:R100F        | -2.48   | H:S31R         | -1.788  | H:S103F        | -1.628  |
| L:A51Y         | -2.384  | L:S30R         | -1.695  | L:S33Y         | -1.470  |
| H:S101D        | -2.292  | H:V101W        | -1.664  | L:S33E         | -1.466  |
| H:S101C        | -2.219  | H:S31F         | -1.656  | L:S62W         | -1.433  |
| H:R100M        | -2.114  | H:G103F        | -1.637  | H:S103Y        | -1.423  |
| H:R100L        | -2.099  | H:S31Y         | -1.545  | L:S33L         | -1.316  |
| L:A51L         | -2.09   | L:S30H         | -1.507  | H:T104Q        | -1.306  |
| L:A51Q         | -1.957  | H:N59F         | -1.496  | H:G101W        | -1.291  |
| L:A51I         | -1.931  | H:I54F         | -1.459  | H:D55Q         | -1.288  |
| H:R100E        | -1.898  | L:S94F         | -1.428  | L:N35R         | -1.241  |
| H:R100I        | -1.892  | H:T52Y         | -1.413  | H:D55I         | -1.213  |
| H:R100D        | -1.887  | H:S31Q         | -1.38   | H:D55H         | -1.199  |
| H:R100V        | -1.874  | L:S30E         | -1.366  | H:S103M        | -1.139  |
| H:S101I        | -1.833  | L:S93E         | -1.365  | L:S33Q         | -1.137  |
| L:A51W         | -1.824  | L:S95F         | -1.356  | L:S33I         | -1.131  |
| L:S67Y         | -1.816  | L:S93Y         | -1.339  | H:S100Q        | -1.126  |
| L:D50E         | -1.791  | L:S93I         | -1.329  | L:S62Y         | -1.114  |
| L:A51E         | -1.768  | H:M102W        | -1.29   | H:D55C         | -1.114  |
| L:S67H         | -1.754  | L:S32Y         | -1.263  | L:S62V         | -1.111  |
| L:S67F         | -1.742  | H:V101F        | -1.263  | H:T31E         | -1.110  |
| H:R100C        | -1.739  | H:N59R         | -1.248  | H:D55S         | -1.087  |
| H:S101V        | -1.731  | H:S31W         | -1.244  | H:I102Y        | -1.085  |
| L:S52F         | -1.697  | H:G103W        | -1.244  | H:T104E        | -1.077  |
| H:R100K        | -1.688  | L:G29F         | -1.24   | H:T31M         | -1.069  |
| L:S92H         | -1.641  | H:L55F         | -1.237  | L:S62M         | -1.055  |
| L:A51M         | -1.626  | H:I57R         | -1.213  | H:S100P        | -1.055  |

|         |        |         |        |         |        |
|---------|--------|---------|--------|---------|--------|
| H:R100A | -1.612 | H:V101L | -1.21  | H:S100A | -1.040 |
| H:R100S | -1.556 | H:S31M  | -1.208 | H:Y27R  | -1.030 |
| H:R100N | -1.523 | H:T100W | -1.198 | H:S100M | -1.010 |
| L:A51K  | -1.512 | L:N27E  | -1.187 | H:Y27W  | -0.998 |
| L:S31Y  | -1.422 | H:I57W  | -1.184 | H:D107W | -0.998 |
| H:R100T | -1.405 | H:N59Y  | -1.178 | H:D55G  | -0.960 |
| H:S101T | -1.362 | H:G50E  | -1.163 | H:P105W | -0.959 |
| L:D50Y  | -1.349 | H:S31K  | -1.159 | H:G101S | -0.958 |
| H:R100Q | -1.336 | H:M102Y | -1.134 | L:S33W  | -0.956 |
| H:S101E | -1.331 | L:S30K  | -1.132 | H:S100T | -0.939 |
| L:A51D  | -1.303 | L:S32W  | -1.121 | L:I34Q  | -0.930 |
| L:S92M  | -1.29  | H:V101M | -1.11  | H:T31I  | -0.923 |
| L:S67M  | -1.274 | L:S93N  | -1.104 | L:S62T  | -0.920 |
| L:A51R  | -1.273 | H:G50Q  | -1.062 | H:I102F | -0.920 |
| H:D105W | -1.269 | L:G29R  | -1.051 | L:S62R  | -0.900 |
| L:S52M  | -1.23  | L:S30M  | -1.03  | L:S62N  | -0.882 |
| L:S67E  | -1.217 | L:G29Y  | -1.013 | L:S62L  | -0.858 |
| H:S101Y | -1.217 | H:I57H  | -1.011 | L:S33C  | -0.832 |
| H:S31W  | -1.199 | L:S94W  | -0.993 | L:S62F  | -0.809 |
| L:S67K  | -1.187 | H:V101R | -0.976 | L:N35Y  | -0.800 |
| L:S92R  | -1.172 | L:S95I  | -0.96  | L:S62H  | -0.789 |
| L:A19K  | -1.166 | L:K31R  | -0.944 | L:N35W  | -0.773 |
| L:A19D  | -1.164 | L:S32F  | -0.939 | L:S33K  | -0.768 |
| L:A51N  | -1.149 | L:G29W  | -0.923 | L:S33R  | -0.709 |
| L:S52Y  | -1.104 | L:S93D  | -0.906 | L:S62I  | -0.695 |
| H:N57Q  | -1.104 | L:G29P  | -0.841 | L:I34Y  | -0.690 |
| H:A33M  | -1.002 | L:N27W  | -0.835 | L:S32N  | -0.677 |
| H:S31F  | -0.995 | L:N27Y  | -0.822 | L:S62Q  | -0.673 |

429

430

431 **Table 2. Selected 80R mutations for library design.** Wild-type residues are listed in bold.  
 432 Underlined residues are potential developability labile sites.

|           | 80R: variable light chain |          |          |          |          |          |          | 80R: variable heavy chain |                 |          |          |          |          |
|-----------|---------------------------|----------|----------|----------|----------|----------|----------|---------------------------|-----------------|----------|----------|----------|----------|
|           | 19                        | 31       | 50       | 51       | 52       | 67       | 92       | 31                        | 54              | 57       | 100      | 101      | 105      |
| wild type | <b>A</b>                  | <b>S</b> | <b>D</b> | <b>A</b> | <b>S</b> | <b>S</b> | <b>S</b> | <b>S</b>                  | <b><u>D</u></b> | <b>N</b> | <b>R</b> | <b>S</b> | <b>D</b> |
|           | K                         | Y        | E        | F        | F        | Y        | H        | W                         | E               | Q        | W        | W        | W        |
|           | D                         |          | Y        | H        | Y        | H        | R        | F                         |                 |          | F        | L        |          |
|           |                           |          |          | Y        |          | F        |          |                           |                 |          | L        | D        |          |
|           |                           |          |          | L        |          | E        |          |                           |                 |          | E        | I        |          |
|           |                           |          |          | Q        |          | K        |          |                           |                 |          | I        | V        |          |
|           |                           |          |          | I        |          |          |          |                           |                 |          | D        | T        |          |
|           |                           |          |          | W        |          |          |          |                           |                 |          | V        | E        |          |
|           |                           |          |          | E        |          |          |          |                           |                 |          | K        | Y        |          |
|           |                           |          |          | K        |          |          |          |                           |                 |          | A        |          |          |
|           |                           |          |          | D        |          |          |          |                           |                 |          | S        |          |          |
|           |                           |          |          | R        |          |          |          |                           |                 |          | N        |          |          |
|           |                           |          |          | N        |          |          |          |                           |                 |          | T        |          |          |
|           |                           |          |          |          |          |          |          |                           |                 |          | Q        |          |          |

433

434

435 **Table 3. Selected m396 mutations for library design.** Wild-type residues are listed in bold.

436 Underlined residues are potential developability labile sites.

|           | m396: variable light chain |          |          |          |          |          |                 |                 |          |          | m396: variable heavy chain |          |          |                 |                 |                 |          |          |                 |          |
|-----------|----------------------------|----------|----------|----------|----------|----------|-----------------|-----------------|----------|----------|----------------------------|----------|----------|-----------------|-----------------|-----------------|----------|----------|-----------------|----------|
|           | 26                         | 27       | 29       | 30       | 31       | 32       | 51              | 92              | 93       | 94       | 95                         | 31       | 52       | 54              | 55              | 57              | 59       | 101      | 102             | 103      |
| wild type | <b><u>N</u></b>            | <b>N</b> | <b>G</b> | <b>S</b> | <b>K</b> | <b>S</b> | <b><u>D</u></b> | <b><u>D</u></b> | <b>S</b> | <b>S</b> | <b>S</b>                   | <b>S</b> | <b>T</b> | <b><u>I</u></b> | <b><u>L</u></b> | <b><u>I</u></b> | <b>N</b> | <b>V</b> | <b><u>M</u></b> | <b>G</b> |
|           | Q                          | E        | F        | Y        | R        | W        | W               | E               | Y        | F        | I                          | R        | Y        | F               | Y               | R               | F        | Y        | W               | F        |
|           |                            | W        | R        | F        |          | F        |                 |                 | I        | W        |                            | F        |          |                 | F               | W               | R        | W        | Y               | W        |
|           | Y                          | W        | W        |          |          |          |                 |                 | N        |          |                            | Y        |          |                 |                 | H               | Y        | F        |                 |          |
|           |                            | P        | R        |          |          |          |                 |                 | D        |          |                            | Q        |          |                 |                 |                 |          | L        |                 |          |
|           |                            |          |          | H        |          |          |                 |                 |          |          |                            | W        |          |                 |                 |                 |          | R        |                 |          |
|           |                            |          |          | E        |          |          |                 |                 |          |          |                            | K        |          |                 |                 |                 |          |          |                 |          |
|           |                            |          |          | K        |          |          |                 |                 |          |          |                            |          |          |                 |                 |                 |          |          |                 |          |

437

438

439 **Table 4. Selected CR3022 mutations for library design.** Wild-type residues are listed in bold.  
 440 Underlined residues are potential developability labile sites.

---

|           | CR3022: variable light chain |          |          |          |          | CR3022: variable heavy chain |          |                 |          |          |          |          |          |          |          |          |
|-----------|------------------------------|----------|----------|----------|----------|------------------------------|----------|-----------------|----------|----------|----------|----------|----------|----------|----------|----------|
|           | 32                           | 33       | 34       | 35       | 62       | 27                           | 31       | 54              | 55       | 100      | 101      | 102      | 103      | 104      | 105      | 107      |
| wild type | <b>S</b>                     | <b>S</b> | <b>I</b> | <b>N</b> | <b>S</b> | <b>Y</b>                     | <b>T</b> | <u><b>D</b></u> | <b>D</b> | <b>S</b> | <b>G</b> | <b>I</b> | <b>S</b> | <b>T</b> | <b>P</b> | <b>D</b> |
|           | N                            | H        | Q        | R        | W        | W                            | E        | E               | Q        | Q        | F        | Y        | W        | Q        | W        | W        |
|           |                              | F        | Y        | Y        | Y        |                              | I        |                 | I        | P        | W        | F        | F        | E        |          |          |
|           |                              | Y        |          | W        | V        |                              |          |                 | H        | A        | S        |          | Y        |          |          |          |
|           |                              | E        |          |          | T        |                              |          |                 | S        | T        |          |          |          |          |          |          |
|           |                              | L        |          |          | R        |                              |          |                 | G        |          |          |          |          |          |          |          |
|           |                              | Q        |          |          | N        |                              |          |                 |          |          |          |          |          |          |          |          |
|           |                              | I        |          |          | L        |                              |          |                 |          |          |          |          |          |          |          |          |
|           |                              | W        |          |          | F        |                              |          |                 |          |          |          |          |          |          |          |          |
|           |                              | K        |          |          | H        |                              |          |                 |          |          |          |          |          |          |          |          |
|           |                              | R        |          |          | I        |                              |          |                 |          |          |          |          |          |          |          |          |

---

441

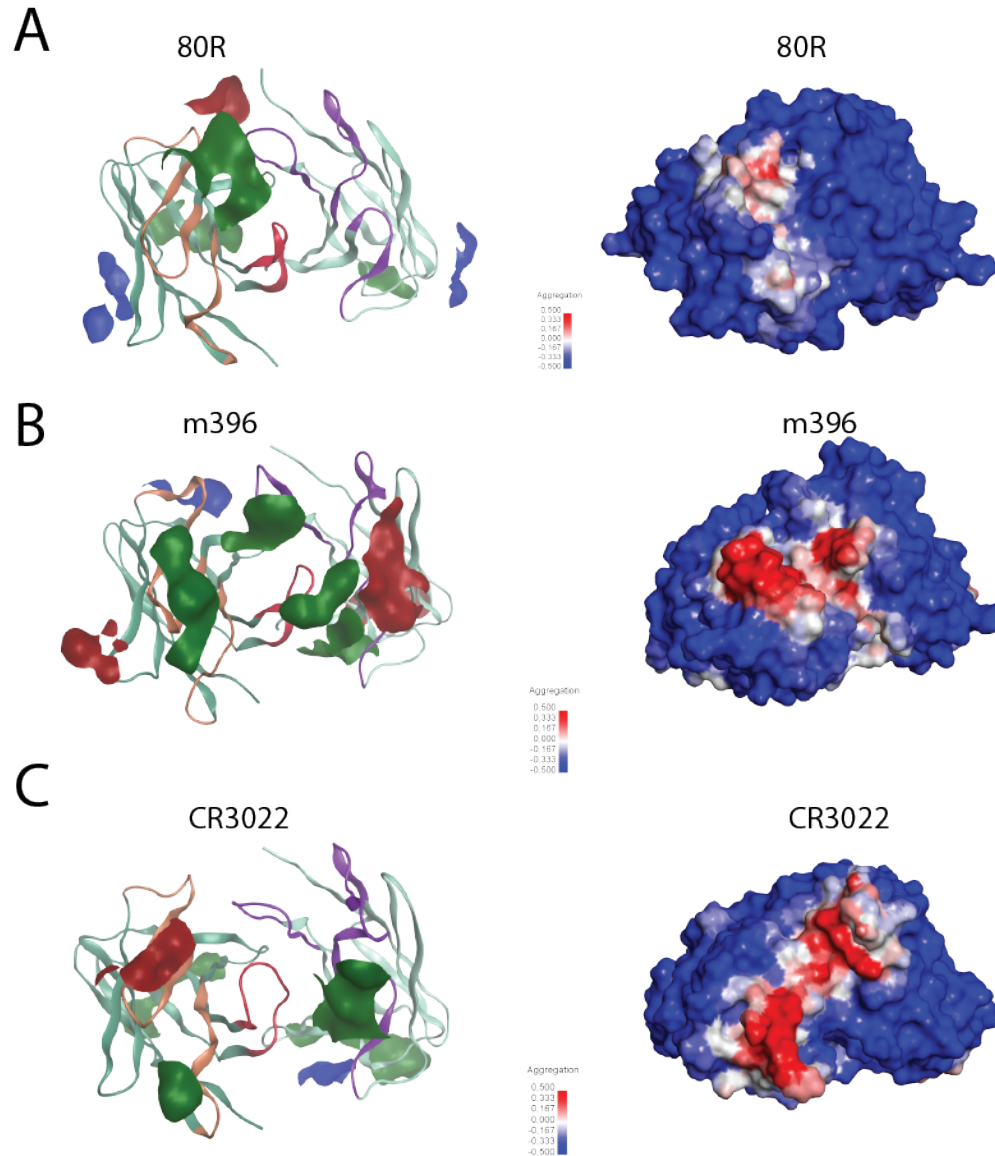

442  
443 **Figure S1. Developability assessment on antibody 80R, m396, and CR3022.** Left: MOE patch  
444 analysis on the Fv region of antibody **(A)** 80R, **(B)** m396, and **(C)** CR3022. Red color indicates  
445 negative-charge patch, blue color indicates positive-charge patch, and green color indicates  
446 hydrophobic patch. Right: spatial aggregation propensity (SAP) analysis of antibody **(A)** 80R,  
447 **(B)** m396, and **(C)** CR3022, with high SAP score colored in red and low SAP score colored in  
448 blue (scale showed in a bar scheme).  
449



450 **Reference**

- 451
- 452 1. Shang, J., et al., *Cell entry mechanisms of SARS-CoV-2*. Proc Natl Acad Sci U S A, 2020.  
453 **117**(21): p. 11727-11734.
  - 454 2. Seyedpour, S., et al., *Targeted therapy strategies against SARS-CoV-2 cell entry*  
455 *mechanisms: A systematic review of in vitro and in vivo studies*. J Cell Physiol, 2020.
  - 456 3. Bristow, M.R., et al., *Dynamic Regulation of SARS-Cov-2 Binding and Cell Entry*  
457 *Mechanisms in Remodeled Human Ventricular Myocardium*. JACC Basic Transl Sci,  
458 2020. **5**(9): p. 871-883.
  - 459 4. Shang, J., et al., *Structural basis of receptor recognition by SARS-CoV-2*. Nature, 2020.  
460 **581**(7807): p. 221-224.
  - 461 5. Lei, C., et al., *Neutralization of SARS-CoV-2 spike pseudotyped virus by recombinant*  
462 *ACE2-Ig*. Nat Commun, 2020. **11**(1): p. 2070.
  - 463 6. Walls, A.C., et al., *Structure, Function, and Antigenicity of the SARS-CoV-2 Spike*  
464 *Glycoprotein*. Cell, 2020. **183**(6): p. 1735.
  - 465 7. Lan, J., et al., *Structure of the SARS-CoV-2 spike receptor-binding domain bound to the*  
466 *ACE2 receptor*. Nature, 2020. **581**(7807): p. 215-220.
  - 467 8. Weinreich, D.M., et al., *REGN-COV2, a Neutralizing Antibody Cocktail, in Outpatients*  
468 *with Covid-19*. N Engl J Med, 2021. **384**(3): p. 238-251.
  - 469 9. Chen, P., et al., *SARS-CoV-2 Neutralizing Antibody LY-CoV555 in Outpatients with*  
470 *Covid-19*. N Engl J Med, 2021. **384**(3): p. 229-237.
  - 471 10. Weisblum, Y., et al., *Escape from neutralizing antibodies by SARS-CoV-2 spike protein*  
472 *variants*. Elife, 2020. **9**.
  - 473 11. Greaney, A.J., et al., *Comprehensive mapping of mutations to the SARS-CoV-2 receptor-*  
474 *binding domain that affect recognition by polyclonal human serum antibodies*. bioRxiv,  
475 2021: p. 2020.12.31.425021.
  - 476 12. Xie, X., et al., *Neutralization of SARS-CoV-2 spike 69/70 deletion, E484K and N501Y*  
477 *variants by BNT162b2 vaccine-elicited sera*. Nat Med, 2021.
  - 478 13. Tang, J.W., et al., *Introduction of the South African SARS-CoV-2 variant 501Y.V2 into*  
479 *the UK*. J Infect, 2021.
  - 480 14. Xu, L., et al., *Trispecific broadly neutralizing HIV antibodies mediate potent SHIV*  
481 *protection in macaques*. Science, 2017. **358**(6359): p. 85-90.
  - 482 15. Laursen, N.S., et al., *Universal protection against influenza infection by a multidomain*  
483 *antibody to influenza hemagglutinin*. Science, 2018. **362**(6414): p. 598-602.
  - 484 16. Hwang, W.C., et al., *Structural basis of neutralization by a human anti-severe acute*  
485 *respiratory syndrome spike protein antibody, 80R*. J Biol Chem, 2006. **281**(45): p. 34610-  
486 6.
  - 487 17. Zhu, Z., et al., *Potent cross-reactive neutralization of SARS coronavirus isolates by*  
488 *human monoclonal antibodies*. Proc Natl Acad Sci U S A, 2007. **104**(29): p. 12123-8.
  - 489 18. Prabakaran, P., et al., *Structure of severe acute respiratory syndrome coronavirus*  
490 *receptor-binding domain complexed with neutralizing antibody*. J Biol Chem, 2006.  
491 **281**(23): p. 15829-36.
  - 492 19. ter Meulen, J., et al., *Human monoclonal antibody combination against SARS*  
493 *coronavirus: synergy and coverage of escape mutants*. PLoS Med, 2006. **3**(7): p. e237.
  - 494 20. Yuan, M., et al., *A highly conserved cryptic epitope in the receptor binding domains of*  
495 *SARS-CoV-2 and SARS-CoV*. Science, 2020. **368**(6491): p. 630-633.

- 496 21. Chennamsetty, N., et al., *Design of therapeutic proteins with enhanced stability*. Proc  
497 Natl Acad Sci U S A, 2009. **106**(29): p. 11937-42.
- 498 22. Vilar, S., G. Cozza, and S. Moro, *Medicinal chemistry and the molecular operating*  
499 *environment (MOE): application of QSAR and molecular docking to drug discovery*. Curr  
500 Top Med Chem, 2008. **8**(18): p. 1555-72.
- 501 23. Sydow, J.F., et al., *Structure-based prediction of asparagine and aspartate degradation*  
502 *sites in antibody variable regions*. PLoS One, 2014. **9**(6): p. e100736.
- 503 24. Robinson, N.E. and A.B. Robinson, *Prediction of protein deamidation rates from*  
504 *primary and three-dimensional structure*. Proc Natl Acad Sci U S A, 2001. **98**(8): p.  
505 4367-72.
- 506 25. Chennamsetty, N., et al., *Modeling the oxidation of methionine residues by peroxides in*  
507 *proteins*. J Pharm Sci, 2015. **104**(4): p. 1246-55.
- 508 26. Ponder, J.W. and D.A. Case, *Force fields for protein simulations*. Adv Protein Chem,  
509 2003. **66**: p. 27-85.
- 510 27. Labute, P., *The generalized Born/volume integral implicit solvent model: estimation of*  
511 *the free energy of hydration using London dispersion instead of atomic surface area*. J  
512 Comput Chem, 2008. **29**(10): p. 1693-8.
- 513 28. Labute, P., *LowModeMD--implicit low-mode velocity filtering applied to conformational*  
514 *search of macrocycles and protein loops*. J Chem Inf Model, 2010. **50**(5): p. 792-800.
- 515 29. Leaver-Fay, A., et al., *Scientific benchmarks for guiding macromolecular energy function*  
516 *improvement*. Methods Enzymol, 2013. **523**: p. 109-43.
- 517 30. Barlow, K.A., et al., *Flex ddG: Rosetta Ensemble-Based Estimation of Changes in*  
518 *Protein-Protein Binding Affinity upon Mutation*. J Phys Chem B, 2018. **122**(21): p. 5389-  
519 5399.
- 520 31. Wang, M., Z. Cang, and G.-W. Wei, *A topology-based network tree for the prediction of*  
521 *protein-protein binding affinity changes following mutation*. Nature Machine  
522 Intelligence, 2020. **2**(2): p. 116-123.
- 523 32. Jankauskaite, J., et al., *SKEMPI 2.0: an updated benchmark of changes in protein-protein*  
524 *binding energy, kinetics and thermodynamics upon mutation*. Bioinformatics, 2019.  
525 **35**(3): p. 462-469.
- 526 33. Sirin, S., et al., *AB-Bind: Antibody binding mutational database for computational*  
527 *affinity predictions*. Protein Sci, 2016. **25**(2): p. 393-409.
- 528 34. Pahari, S., et al., *SAAMBE-3D: Predicting Effect of Mutations on Protein-Protein*  
529 *Interactions*. Int J Mol Sci, 2020. **21**(7).
- 530 35. Sulea, T., et al., *Application of Assisted Design of Antibody and Protein Therapeutics*  
531 *(ADAPT) improves efficacy of a Clostridium difficile toxin A single-domain antibody*. Sci  
532 Rep, 2018. **8**(1): p. 2260.
- 533 36. Tian, X., et al., *Potent binding of 2019 novel coronavirus spike protein by a SARS*  
534 *coronavirus-specific human monoclonal antibody*. Emerg Microbes Infect, 2020. **9**(1): p.  
535 382-385.
- 536 37. Yi, C., et al., *Key residues of the receptor binding motif in the spike protein of SARS-*  
537 *CoV-2 that interact with ACE2 and neutralizing antibodies*. Cell Mol Immunol, 2020.  
538 **17**(6): p. 621-630.
- 539 38. Qiu, H., et al., *Engineering an anti-CD52 antibody for enhanced deamidation stability*.  
540 MAbs, 2019. **11**(7): p. 1266-1275.

- 541 39. Watanabe, Y., et al., *Site-specific glycan analysis of the SARS-CoV-2 spike*. Science, 542 2020. **369**(6501): p. 330-333.
- 543 40. Wang, R., et al., *An extensive test of 14 scoring functions using the PDBbind refined set* 544 *of 800 protein-ligand complexes*. J Chem Inf Comput Sci, 2004. **44**(6): p. 2114-25.
- 545 41. Charifson, P.S., et al., *Consensus scoring: A method for obtaining improved hit rates* 546 *from docking databases of three-dimensional structures into proteins*. J Med Chem, 547 1999. **42**(25): p. 5100-9.
- 548 42. Ginalski, K., et al., *3D-Jury: a simple approach to improve protein structure predictions*. 549 Bioinformatics, 2003. **19**(8): p. 1015-8.
- 550 43. Saini, H.K. and D. Fischer, *Meta-DP: domain prediction meta-server*. Bioinformatics, 551 2005. **21**(12): p. 2917-20.
- 552 44. Sulea, T., et al., *Assessment of Solvated Interaction Energy Function for Ranking* 553 *Antibody-Antigen Binding Affinities*. J Chem Inf Model, 2016. **56**(7): p. 1292-303.
- 554 45. Vivcharuk, V., et al., *Assisted Design of Antibody and Protein Therapeutics (ADAPT)*. 555 PLoS One, 2017. **12**(7): p. e0181490.
- 556 46. Steinmetz, A., et al., *CODV-Ig, a universal bispecific tetravalent and multifunctional* 557 *immunoglobulin format for medical applications*. MAbs, 2016. **8**(5): p. 867-78.
- 558 47. Wrobel, A.G., et al., *Antibody-mediated disruption of the SARS-CoV-2 spike* 559 *glycoprotein*. Nat Commun, 2020. **11**(1): p. 5337.
- 560 48. Lee, W.S., et al., *Antibody-dependent enhancement and SARS-CoV-2 vaccines and* 561 *therapies*. Nat Microbiol, 2020. **5**(10): p. 1185-1191.
- 562 49. Chan, C.E.Z., et al., *The Fc-mediated effector functions of a potent SARS-CoV-2* 563 *neutralizing antibody, SC31, isolated from an early convalescent COVID-19 patient, are* 564 *essential for the optimal therapeutic efficacy of the antibody*. bioRxiv, 2020: p. 565 2020.10.26.355107.
- 566 50. Zhou, Q., et al., *Engineered Fc-glycosylation switch to eliminate antibody effector* 567 *function*. MAbs, 2020. **12**(1): p. 1814583.
- 568 51. Mackness, B.C., et al., *Antibody Fc engineering for enhanced neonatal Fc receptor* 569 *binding and prolonged circulation half-life*. MAbs, 2019. **11**(7): p. 1276-1288.
- 570 52. Magar, R., P. Yadav, and A.B. Farimani, *Potential Neutralizing Antibodies Discovered* 571 *for Novel Corona Virus Using Machine Learning*. bioRxiv, 2020: p. 2020.03.14.992156.
- 572 53. Desautels, T., et al., *Rapid *in silico* design of antibodies targeting SARS-* 573 *CoV-2 using machine learning and supercomputing*. bioRxiv, 2020: p. 574 2020.04.03.024885.

575
